# Supplementary material for: A Novel Deep Learning Method for Predicting RNA-Protein Binding Sites
Source: MDPI journal article supplement (doi:10.3390/app13053247), 2023-03-03
Supplement: s1 [file s1]

**Table S1.** The details of the original RBP-24 dataset.

| RBP           | Training Set    |                      |                      | Testing Set     |                      |                      |
|---------------|-----------------|----------------------|----------------------|-----------------|----------------------|----------------------|
|               | Dataset<br>Size | Positive<br>Examples | Negative<br>Examples | Dataset<br>Size | Positive<br>Examples | Negative<br>Examples |
| ALKBH5        | 2410            | 1197                 | 1213                 | 266             | 134                  | 132                  |
| C17ORF8<br>5  | 3754            | 1905                 | 1849                 | 411             | 206                  | 205                  |
| C22ORF2<br>8  | 18,505          | 9369                 | 9136                 | 1000            | 500                  | 500                  |
| CAPRIN1       | 16,041          | 8140                 | 7901                 | 1000            | 500                  | 500                  |
| AGO2          | 92,346          | 48,095               | 44,251               | 1000            | 500                  | 500                  |
| ELAVL1<br>H   | 17,031          | 8595                 | 8436                 | 1000            | 500                  | 500                  |
| SFRS1         | 36,633          | 19,438               | 17,195               | 1000            | 500                  | 500                  |
| HNRNPC        | 41,266          | 21,472               | 19,794               | 1000            | 500                  | 500                  |
| TDP43         | 167,110         | 92,031               | 75,079               | 1000            | 500                  | 500                  |
| TIA1          | 34,184          | 18,049               | 16,135               | 1000            | 500                  | 500                  |
| TIAL1         | 78,984          | 42,332               | 36,652               | 1000            | 500                  | 500                  |
| AGO1-4        | 68,212          | 36,902               | 31,310               | 1000            | 500                  | 500                  |
| ELAVL1B       | 51,249          | 27,275               | 23,974               | 1000            | 500                  | 500                  |
| ELAVL1<br>A   | 18,747          | 9464                 | 9283                 | 1000            | 500                  | 500                  |
| EWSR1         | 31,012          | 16,292               | 1472                 | 1000            | 500                  | 500                  |
| FUS           | 66,061          | 34,581               | 31,480               | 1000            | 500                  | 500                  |
| ELAVL1C       | 238,888         | 125,202              | 113,686              | 1000            | 500                  | 500                  |
| IGF2BP1-<br>3 | 15,377          | 8539                 | 6838                 | 1000            | 500                  | 500                  |
| MOV10         | 26,780          | 13,793               | 12,987               | 1000            | 500                  | 500                  |
| PUM2          | 17,343          | 9116                 | 8227                 | 1000            | 500                  | 500                  |
| QKI           | 19,418          | 10,276               | 9142                 | 1000            | 500                  | 500                  |
| TAF15         | 13,904          | 7298                 | 6606                 | 1000            | 500                  | 500                  |
| PTB           | 88,274          | 44,574               | 43,700               | 1000            | 500                  | 500                  |
| ZC3H7B        | 40,890          | 20,962               | 20,018               | 1000            | 500                  | 500                  |
